# Supplementary material
Source: PubMed Central journal article supplement (PMC7854301)
Supplement: mmc1.pdf [file mmc1.pdf]

**YMTHE, Volume 29**

## **Supplemental Information**

**The Chemokine Receptors Ccr5 and Cxcr6**

**Enhance Migration of Mesenchymal**

**Stem Cells into the Degenerating Retina**

**Martina Pesaresi, Sergi A. Bonilla-Pons, Ruben Sebastian-Perez, Umberto Di Vicino, Marc Alcoverro-Bertran, Ralph Michael, and Maria Pia Cosma**

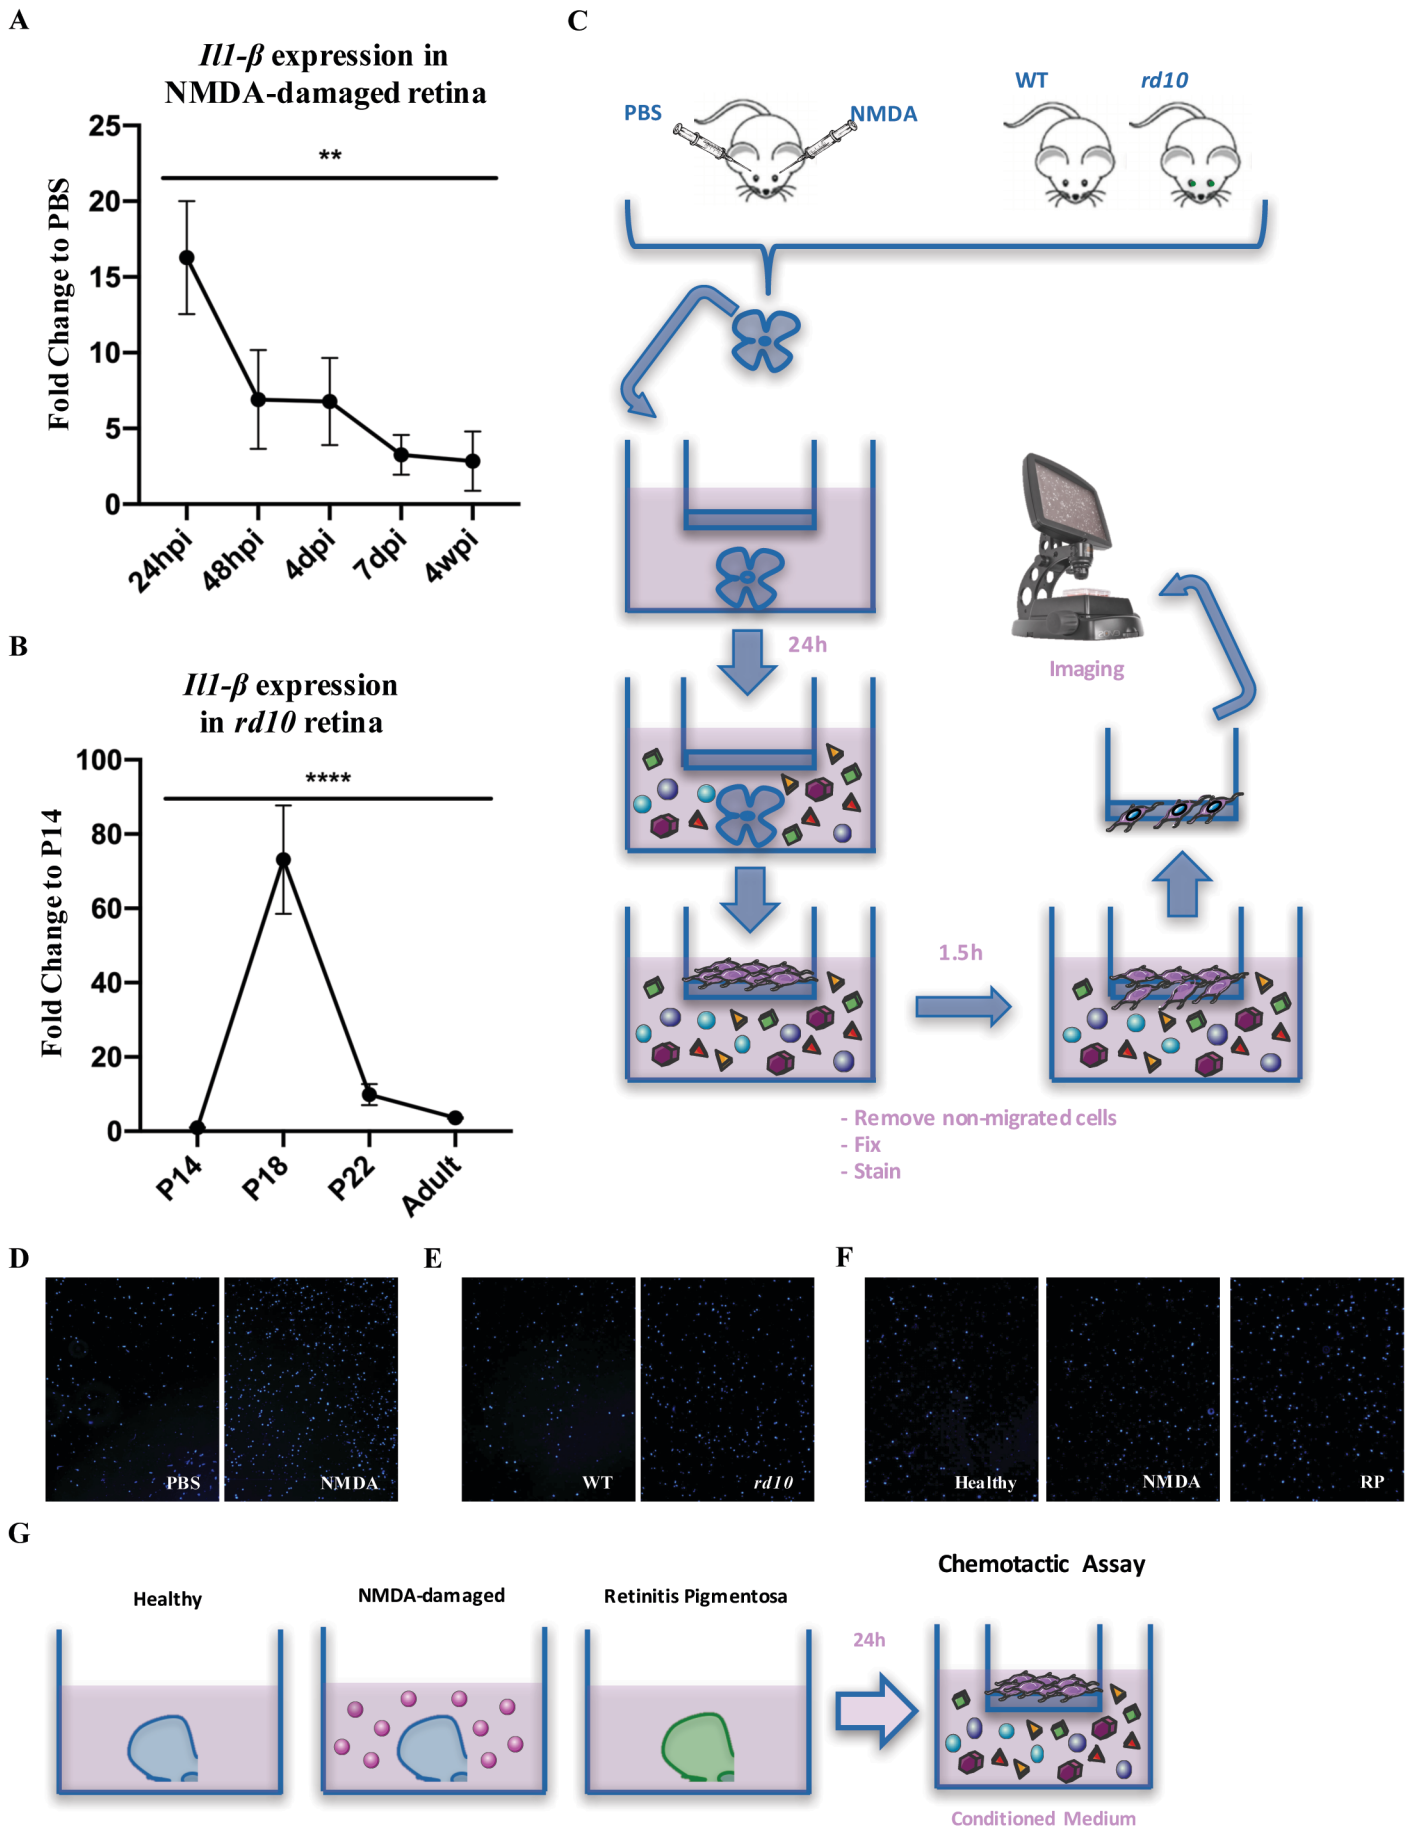

Fig. S1



**Fig. S1. Retinal damage is associated with an acute peak in *III-β* expression.** qRT-PCR of *III-β* levels in the (A) NMDA-damaged retina (24 hpi, 48 hpi, 4 dpi, 7 dpi, 4 wpi) and in the (B) *rd10* retina (P14, P18, P22, adult). Transcript levels are expressed as fold-changes to control (PBS-injected or P14) retinae. Data are presented as mean ± SEM from n ≥ 3 independent experiments. One Way Anova was used for statistical analysis. (C) Experimental scheme of chemotactic assays with murine samples. WT mice received intravitreal injection of NMDA to induce retinal degeneration; the contralateral eye was injected with PBS, as a control. PBS/NMDA-injected animals were sacrificed 24 hpi. *Rd10* mice (and their age-matched WT controls) were instead sacrificed at P18. Eyecups were then cultured for 24h in SF medium. At the moment of the assay, a suspension of 2\*10<sup>5</sup> MSC in SF medium was seeded in the upper chamber. Following incubation, non-migrated cells were removed. Migrated cells stuck in the porous membrane of the transwell were stained with DAPI, imaged and quantified. Representative DAPI-stained fields from PBS vs NMDA (D), and from WT vs *rd10* (E) transwell assays. (F) Representative DAPI-stained fields from healthy, NMDA and RP transwell assays performed with human samples. (G) Experimental scheme of chemotactic assays with human samples. The central part of the retina was divided into quarters. For each of the experiments, a quarter was cultured in control medium, while another one was cultured in medium containing NMDA (1mM). Similarly, a quarter from a healthy control and a quarter from a RP retina were cultured in parallel. After 24h, the conditioned medium was collected and used to perform chemotactic assays.

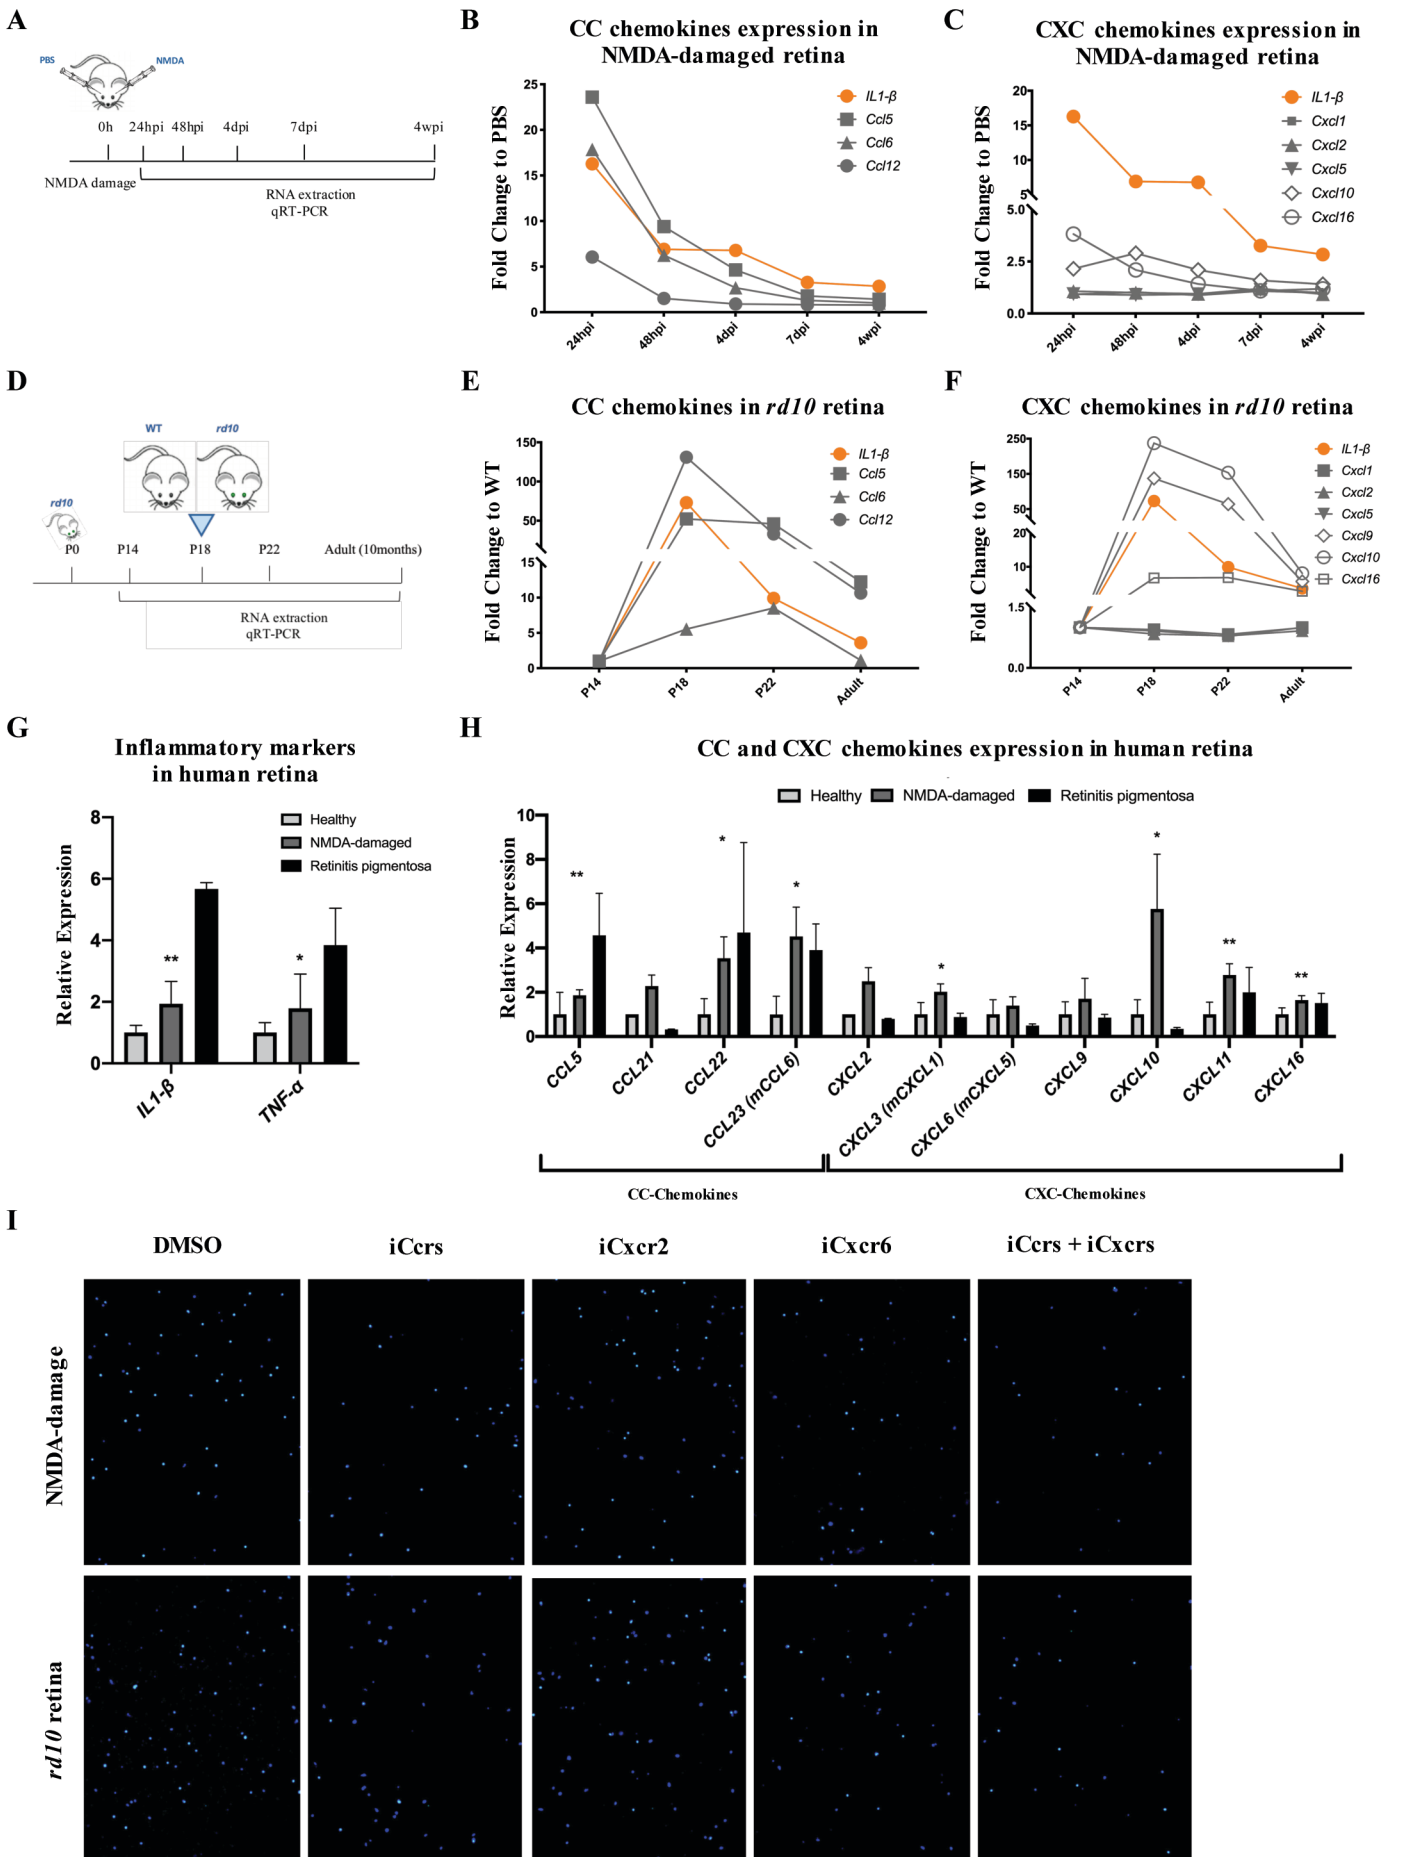

Fig. S2

**Fig. S2. Retina degeneration is associated with time-dependent inflammation and increased expression of specific CC and CXC inflammatory chemokines.** (A) Experimental scheme indicating analyzed time-points for PBS- and NMDA-injected (24 hpi, 48 hpi, 4 dpi, 7 dpi, 4 wpi). Time course analysis of *Il1- $\beta$*  and either of *CC* (B) or *CXC* (C) chemokines expression in NMDA-damaged retinae. Transcript levels are expressed as fold-change to control (PBS-injected) retinae. Data are presented as mean from  $n \geq 3$  independent experiments. (D) Experimental scheme indicating analyzed time-points for WT and *rd10* retinae (P14, P18, P22, adult). Time course analysis of *Il1- $\beta$*  and either of *CC* (E) or *CXC* (F) chemokines expression in *rd10* retinae. Transcript levels are expressed as fold-change to P14 retinae. Data are presented as mean from  $n \geq 3$  independent experiments. (G) qRT-PCR of pro-inflammatory cytokines *Il1- $\beta$*  and *TNF- $\alpha$*  in healthy, NMDA-damaged and RP human retinae, cultured for 24h. Transcript levels are expressed as fold-change to the healthy controls. Data are presented as mean  $\pm$  SD from  $n \geq 3$  (NMDA-damaged) or  $n = 2$  (RP) independent experiments. Mann-Whitney test was used for statistical analysis. (H) qRT-PCR of *CC* and *CXC* chemokines levels in healthy, NMDA-damaged and RP human retinae, cultured for 24h. Transcript levels are expressed as fold-change to the healthy controls. Data are presented as mean  $\pm$  SD from  $n \geq 3$  (NMDA-damage) or  $n = 2$  (RP) independent experiments. Mann-Whitney test was used for statistical analysis. (I) Representative DAPI-stained fields from transwell assays assessing migration of mMSCs towards either NMDA-damaged (top) or *rd10* (bottom) retinae, in the presence of DMSO (vehicle), iCxc2, iCcrs (Ccr1, Ccr3, Ccr5), iCxc6 or iCcrs (Ccr1, Ccr3, Ccr5) + iCxcrs (iCxc2 + iCxc6).

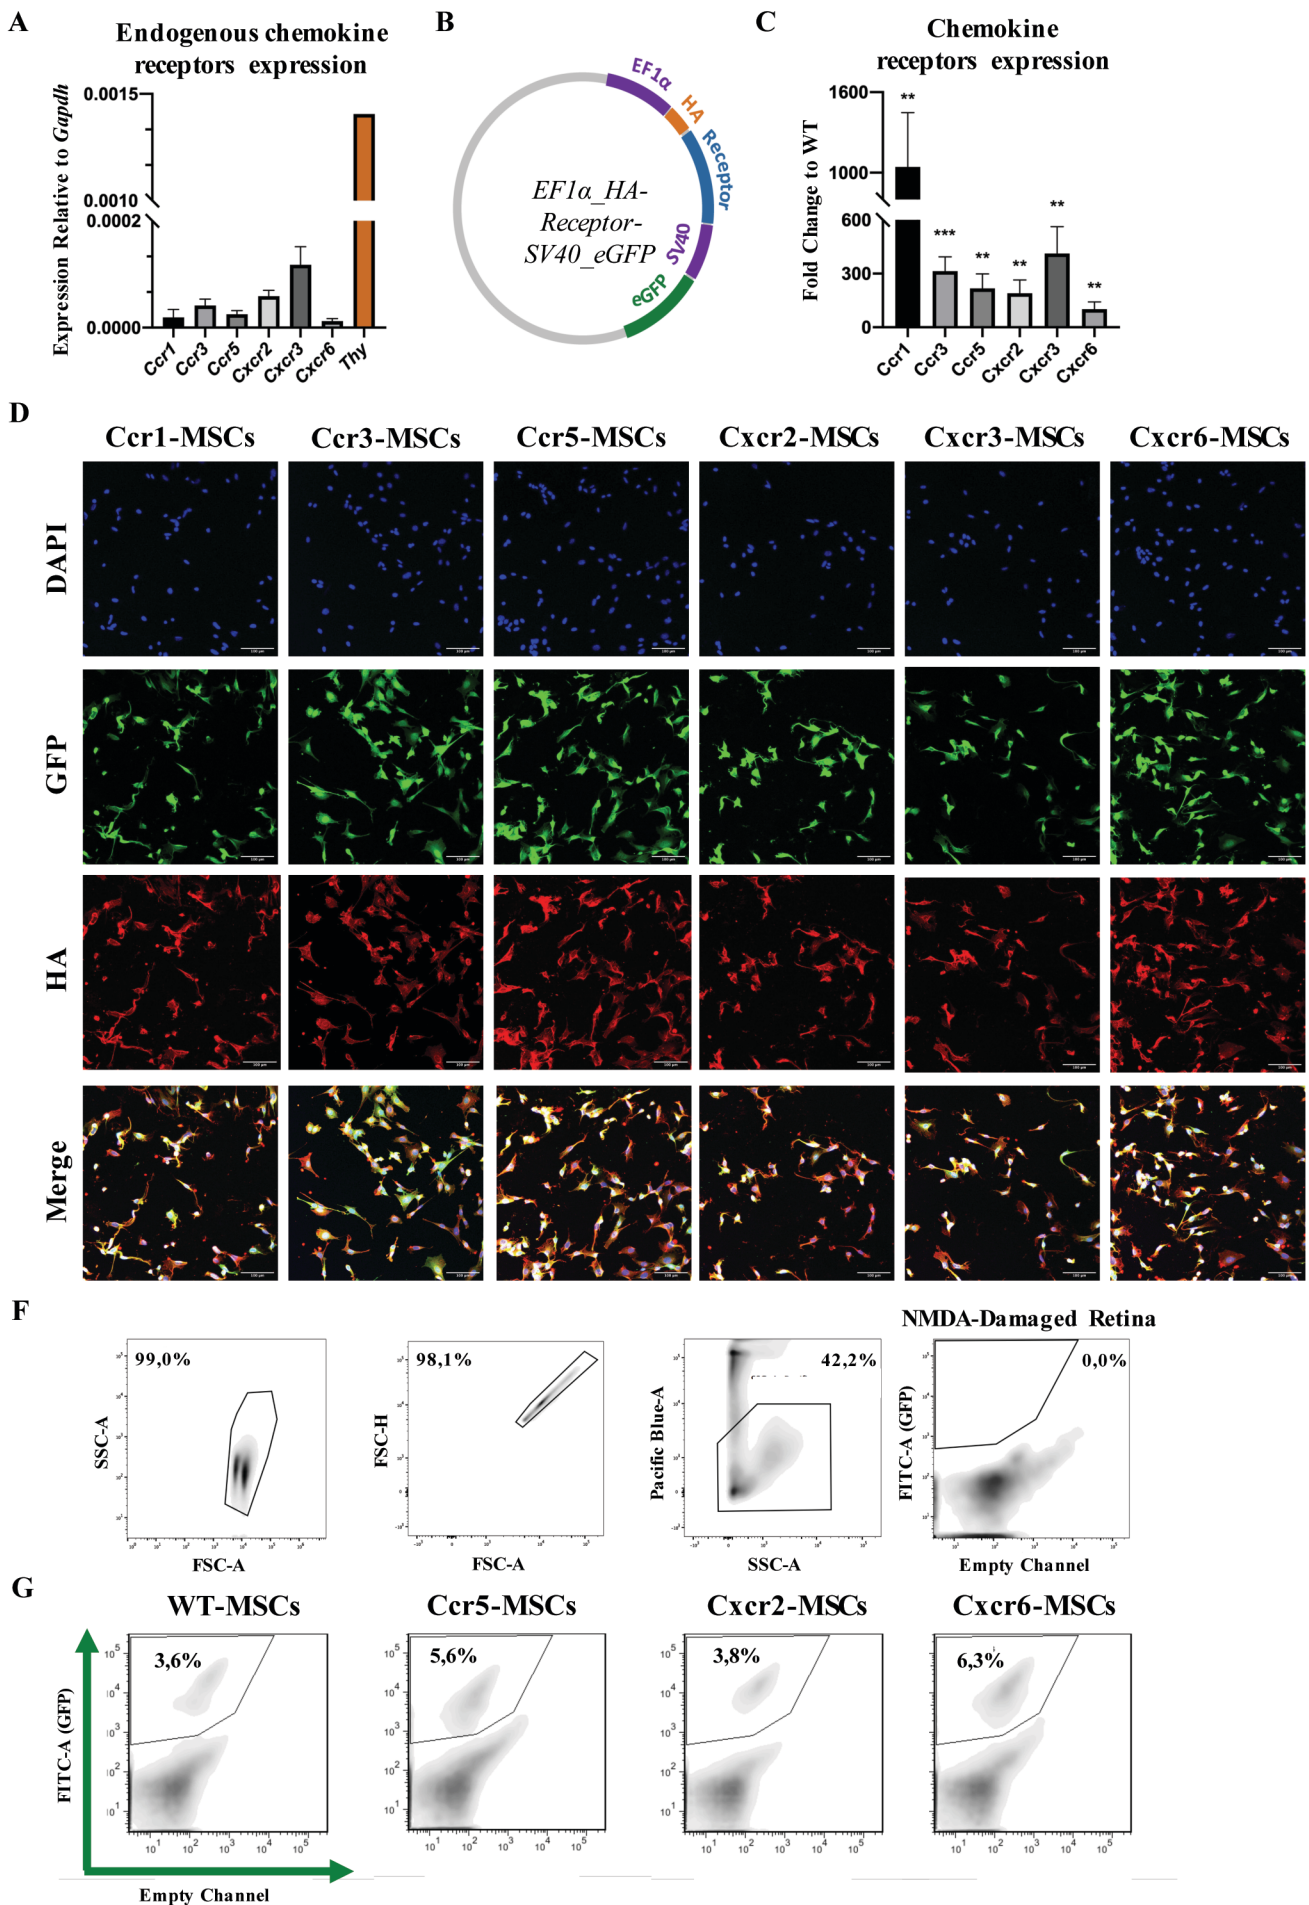

Fig. S3

**Fig. S3. Characterization of OE-MSc lines.** (A) qRT-PCR of endogenous *Ccr1*, *Ccr3*, *Ccr5*, *Cxcr2*, *Cxcr3*, *Cxcr6* and *Thy (Cd90)* expression in mMSCs. Transcript levels are normalized to *Gapdh* expression. Data are presented as mean  $\pm$  SD from n = 3 independent experiments. (B) Lentiviral constructs used to infect mMSCs. Constitutive EF1 $\alpha$  and SV40 promoters drive expression of the HA-tagged receptors (i.e. *Ccr1*, *Ccr3*, *Ccr5*, *Cxcr2*, *Cxcr3* and *Cxcr6*, or empty control) and of the eGFP marker respectively. (C) qRT-PCR showing expression of the *Ccr1*, *Ccr3*, *Ccr5*, *Cxcr2*, *Cxcr3* and *Cxcr6* genes in the corresponding mMSC-OE lines. Transcript levels are expressed as fold-change to WT-MSc control. Data are presented as mean  $\pm$  SD from n = 3 independent experiments. Mann-Whitney test was used for statistical analysis. (D) Representative immunofluorescence staining of OE-MSc lines (*Ccr1*, *Ccr3*, *Ccr5*, *Cxcr2*, *Cxcr3* and *Cxcr6*) to verify expression of the eGFP (green) and of the HA (red) tags. (E) Representative FACS gating strategy. From left to right: side scatter area vs forward scatter area; forward scatter height vs forward scatter area, to exclude cell-cell aggregates; Pacific Blue area vs side scatter area to exclude DAPI<sup>+</sup> and keep only living cells in the analysis; example of an NMDA-damaged retina that had not been transplanted with GFP<sup>+</sup> MSCs, to set gate for GFP<sup>+</sup> cells. (F) Representative FACS plots from MSC-WT, MSC-*Ccr5*, MSC-*Cxcr2* and MSC-*Cxcr6* transplanted into NMDA-damaged retinæ.

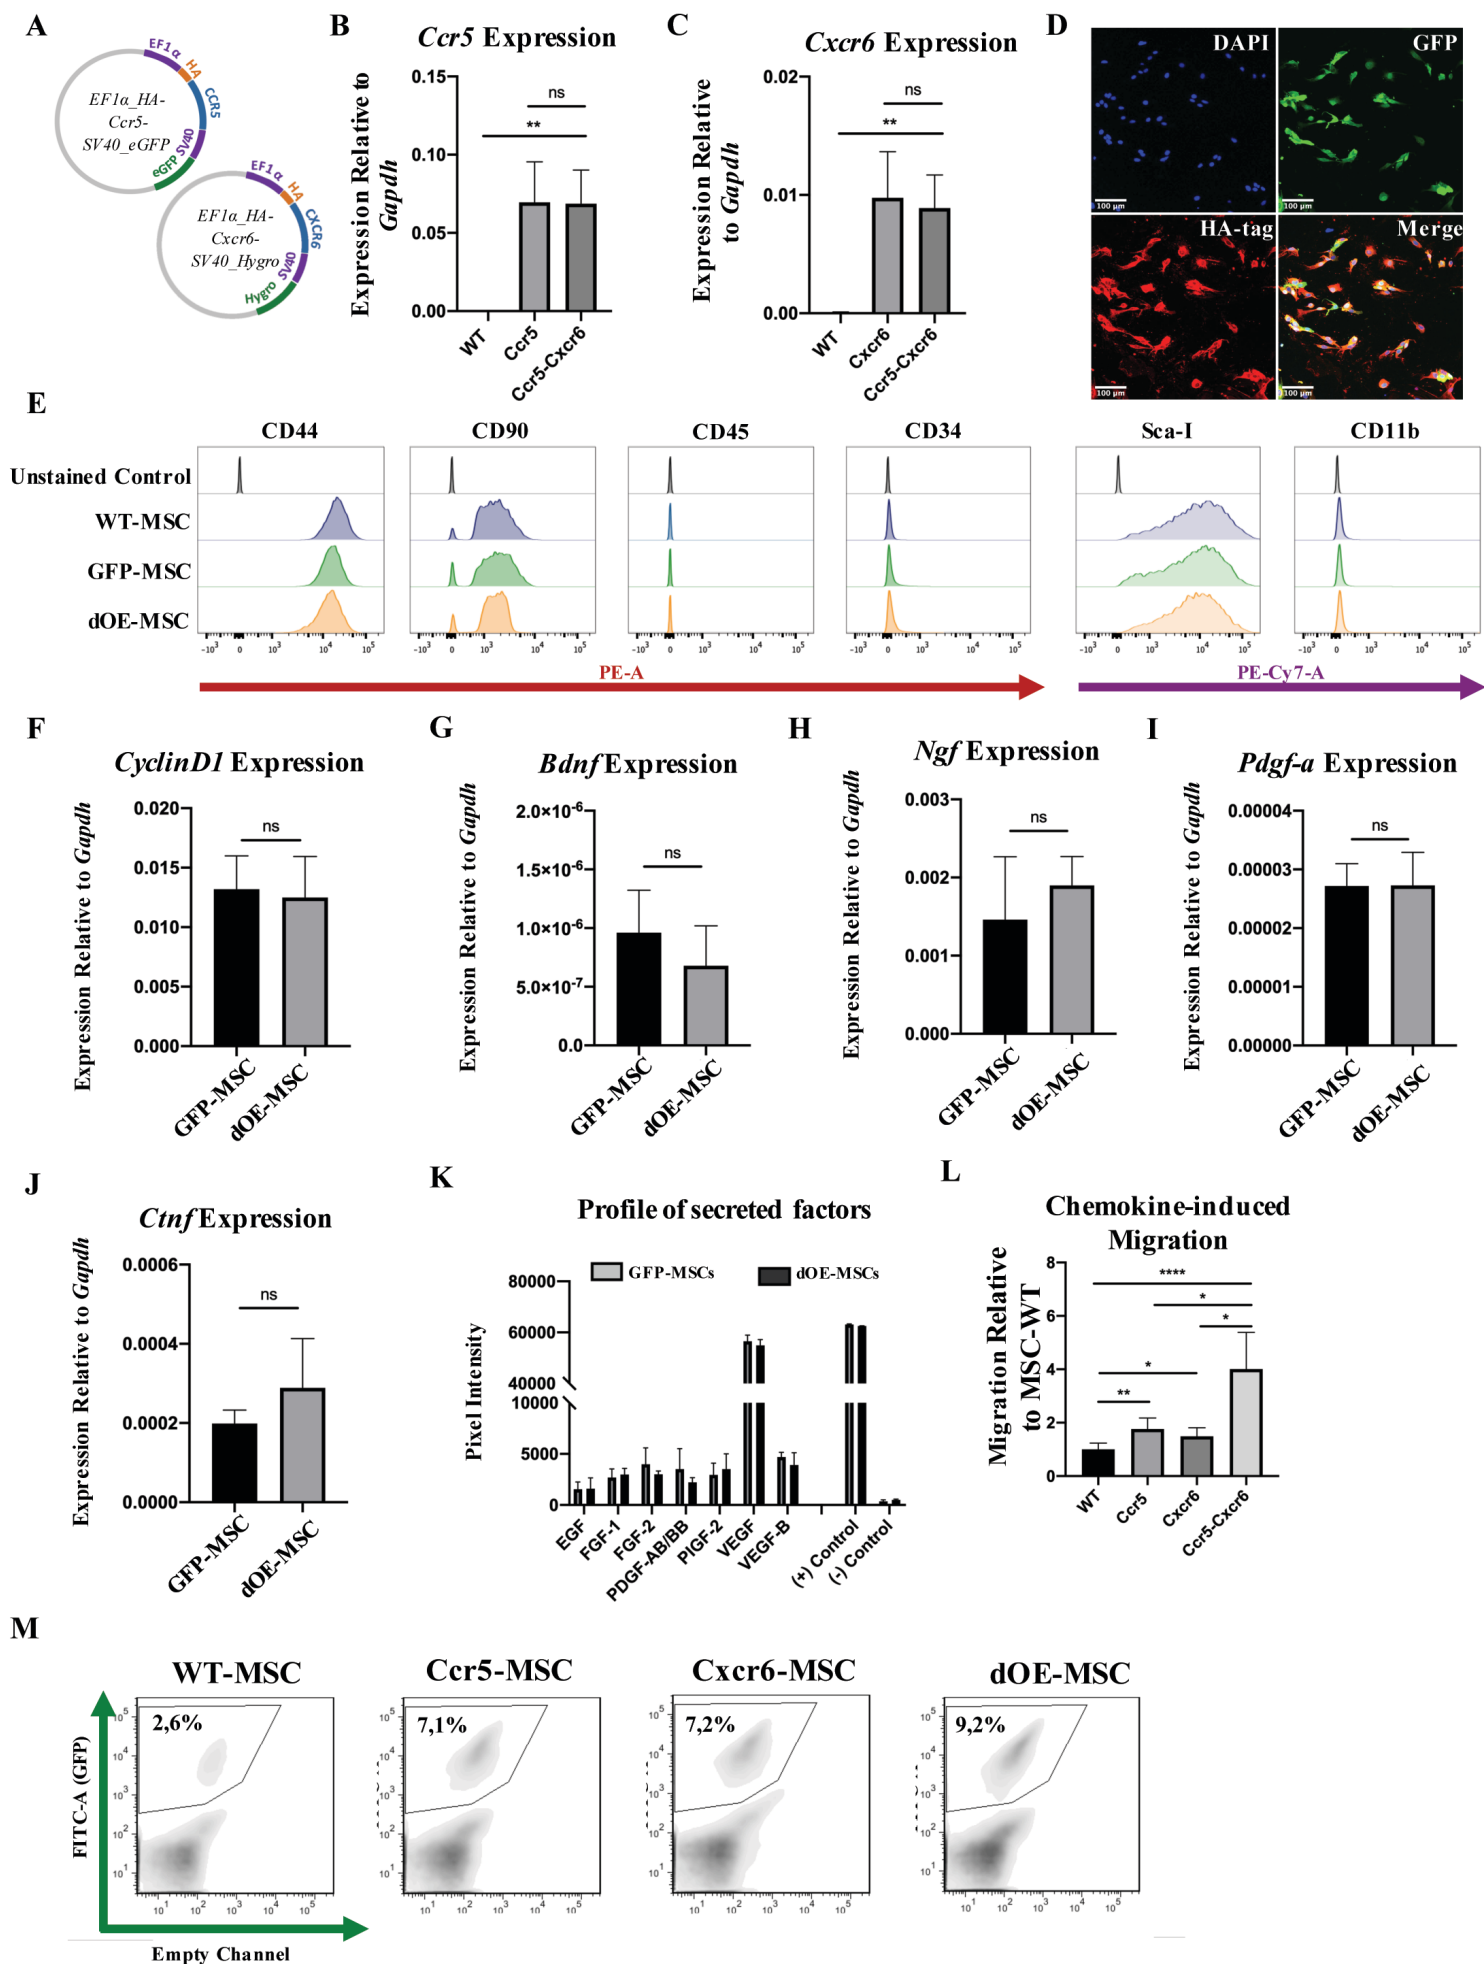

Fig. S4

**Fig. S4. Characterization of Ccr5-Cxcr6-MSCs.** (A) Scheme of lentiviral plasmids used to infect MSCs. Constitutive EF1 $\alpha$  and SV40 promoters drive expression of the HA-tagged receptors (i.e. *Ccr5* or *Cxcr6*) and of the markers (i.e. eGFP or Hygromycin) respectively. Ccr5-Cxcr6 double positive cells were isolated by FACS-sorting for eGFP and applying hygromycin selection. qRT-PCR showing expression of either the (B) *Ccr5* or the (C) *Cxcr6* genes in the Ccr5-Cxcr6 double positive MSCs and in the corresponding single-expressing OE-MSC lines (i.e. Ccr5-MSC or Cxcr6-MSC). Transcript levels are expressed as fold-change to GFP<sup>+</sup> Empty- (WT-) MSC control. Data are presented as mean  $\pm$  SD from n = 3 independent experiments. Two-tailed Student's T-test was used for statistical analysis. (D) Representative immunofluorescence staining of Ccr5-Cxcr6-MSCs to verify expression of the eGFP (green) and of the HA (red) tags. Scale bar = 100  $\mu$ m. (E) Flow cytometry analysis comparing the levels of the indicated surface markers (CD44, CD90, CD45, CD34, Sca-I and CD11b) on WT-, GFP- and dOE-MSCs. qRT-PCR showing expression of (F) *CyclinD1*, (G) *Bdnf*, (H) *Ngf*, (I) *Pdgf- $\alpha$*  and (J) *Ctnf* genes in GFP- and dOE-MSCs. Transcript levels are normalized to *Gapdh* expression. Data are presented as mean  $\pm$  SD from n = 3 independent experiments. Two-tailed Student's T-test was used for statistical analysis. (K) Profile of neurotrophic factors secreted in SF medium over 24h by GFP- and dOE-MSCs. Pixel intensity is directly proportional to the total amount of protein in sample. No statistically significant changes were detected. Data are presented as mean  $\pm$  SD from n = 2 independent experiments. (L) Quantification of migrated MSCs (Ccr5-, Cxcr6, or Ccr5-Cxcr6) towards a concentration of 50 ng ml<sup>-1</sup> of Ccl5 and Cxcl16, from transwell-based assays. Number of migrated cells is expressed as fold-change to control (WT-MSC). Data are presented as mean  $\pm$  SD from n  $\geq$  3 independent experiments. Mann-Whitney test was used for statistical analysis. (M) Representative FACS plots from MSC-WT, MSC-Ccr5, MSC-Cxcr6 and MSC-Ccr5-Cxcr6 transplanted into NMDA-damaged retinæ.



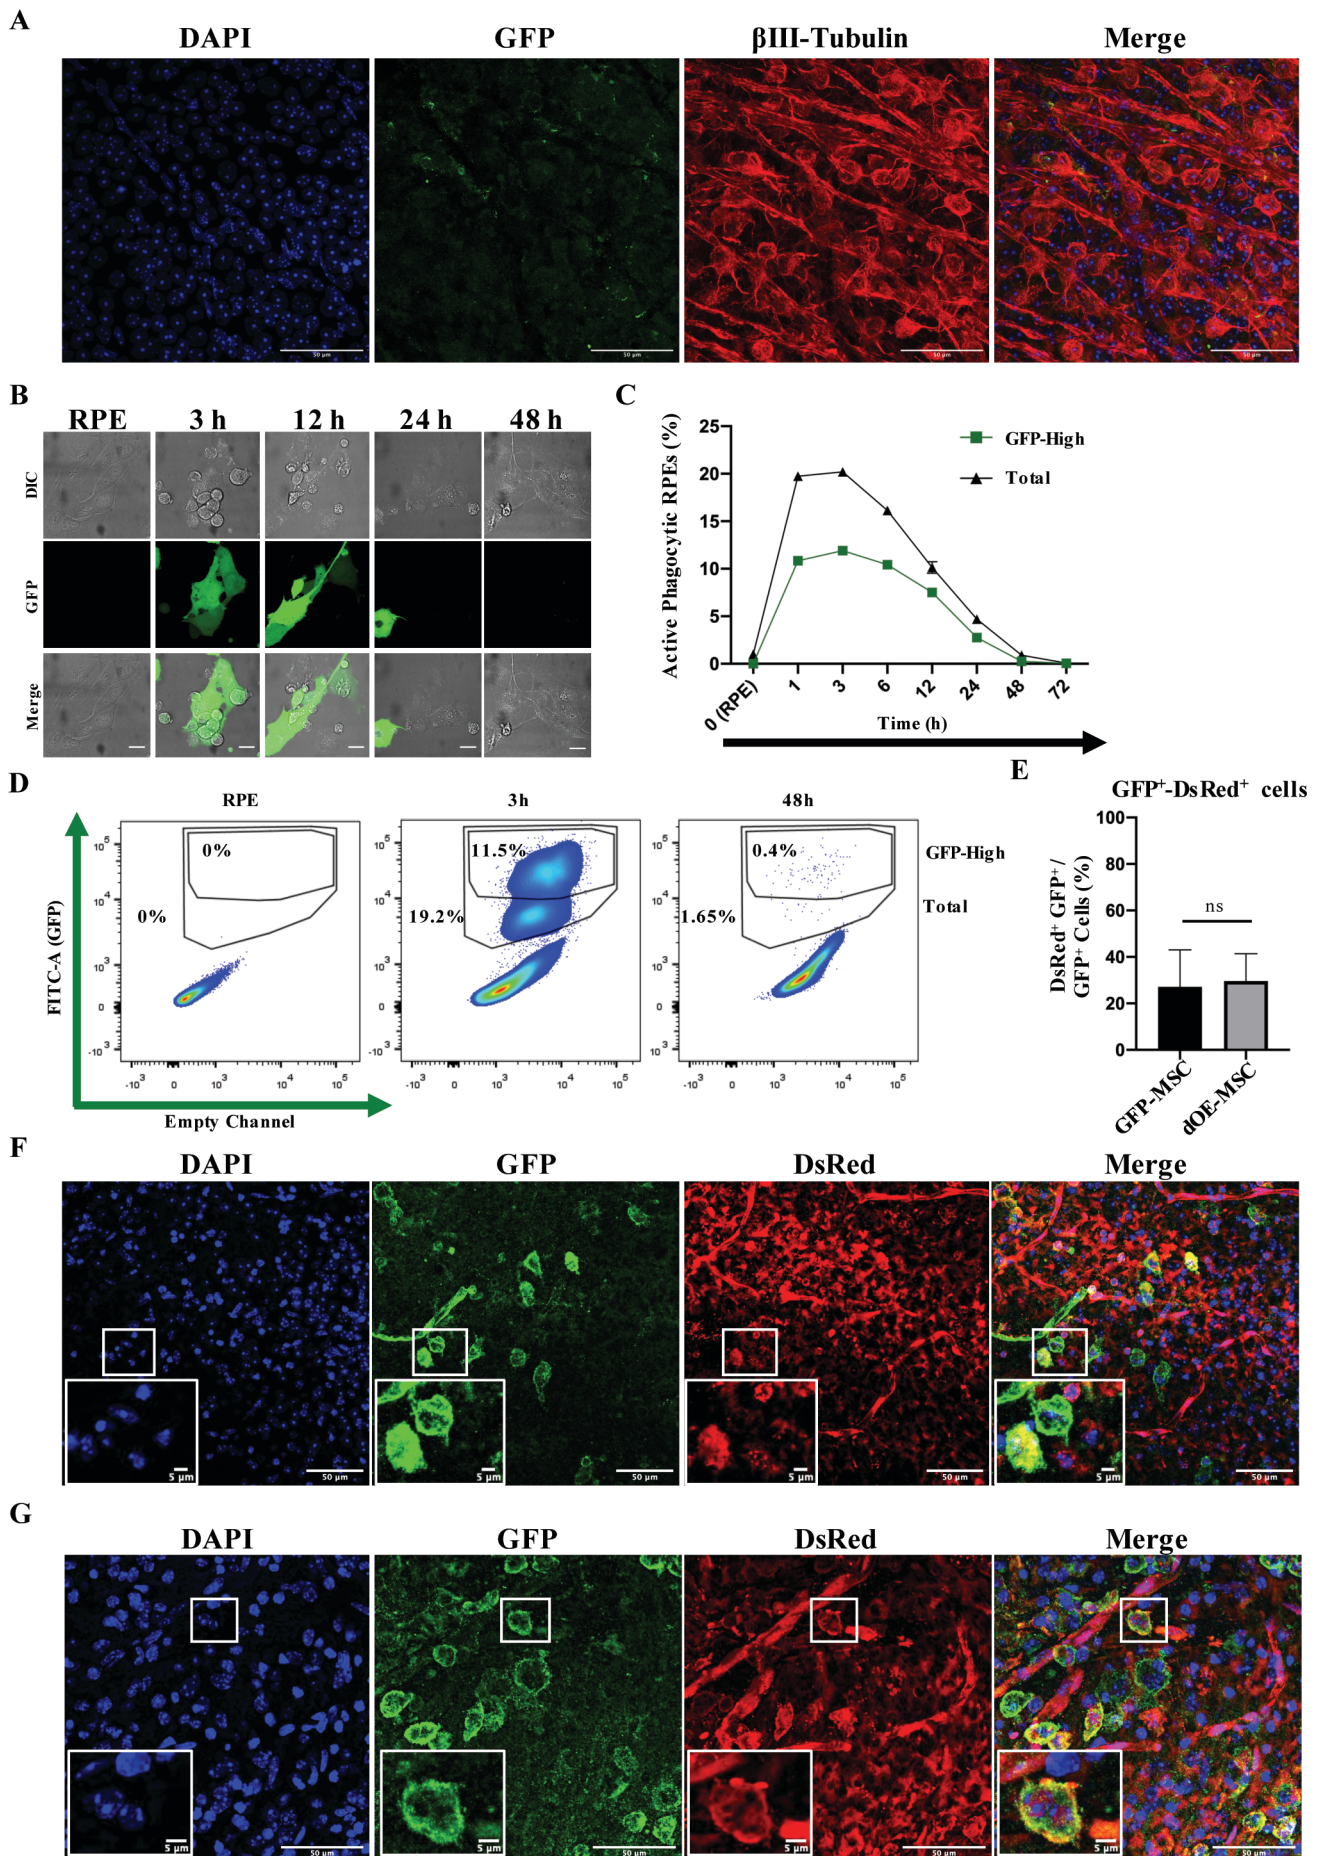

Fig. S5



**Fig. S5. A percentage of transplanted MSCs might be phagocytosed or undergo cell fusion** (A) Field of view from an undamaged area of retinal flat mount prepared from an NMDA-injected eye that had been transplanted with dOE-MSCs, 3 weeks post-injection (3wpi). The tissue was stained for GFP (green),  $\beta$ III-tubulin (red), and DAPI (blue). Scale bar = 50  $\mu$ m. (B) Imaging of RPE cells co-cultured with GFP-MSC-derived apoptotic bodies for 0 (RPE), 3, 12 and 48h. (C) Flow cytometry analysis of RPE cells co-cultured with GFP-MSC-derived apoptotic bodies for 0 (RPE), 1, 3, 6, 12, 48 and 72h. (D) Representative FACS plots for RPE (control), 3h and 48h samples. Based on the RPE control, we defined the gate for GFP-positive, actively phagocytic, RPEs (total); within such gate, we also analyzed the population of GFP-high RPE cells (GFP-high). (E) Quantification of GFP<sup>+</sup>-DsRed<sup>+</sup> double positive cells from DsRed<sup>+</sup> retinal flat mounts wpi, expressed as a percentage over the total GFP<sup>+</sup> cells in the field of view. Data are presented as mean  $\pm$  SD (n = 3). Two-tailed Student's T-test was used for statistical analysis. (F, G) Representative field of view from retinal flat mounts prepared from an NMDA-damaged DsRed<sup>+</sup> eye that had been transplanted with dOE-MSCs (3wpi). The tissue was stained for GFP (green), DsRed (red) and DAPI (blue). Scale bar = 50  $\mu$ m. Inserts at the bottom-left corner show higher magnification of the regions in the white square and include one representative heterokaryon (scale bar = 5  $\mu$ m).

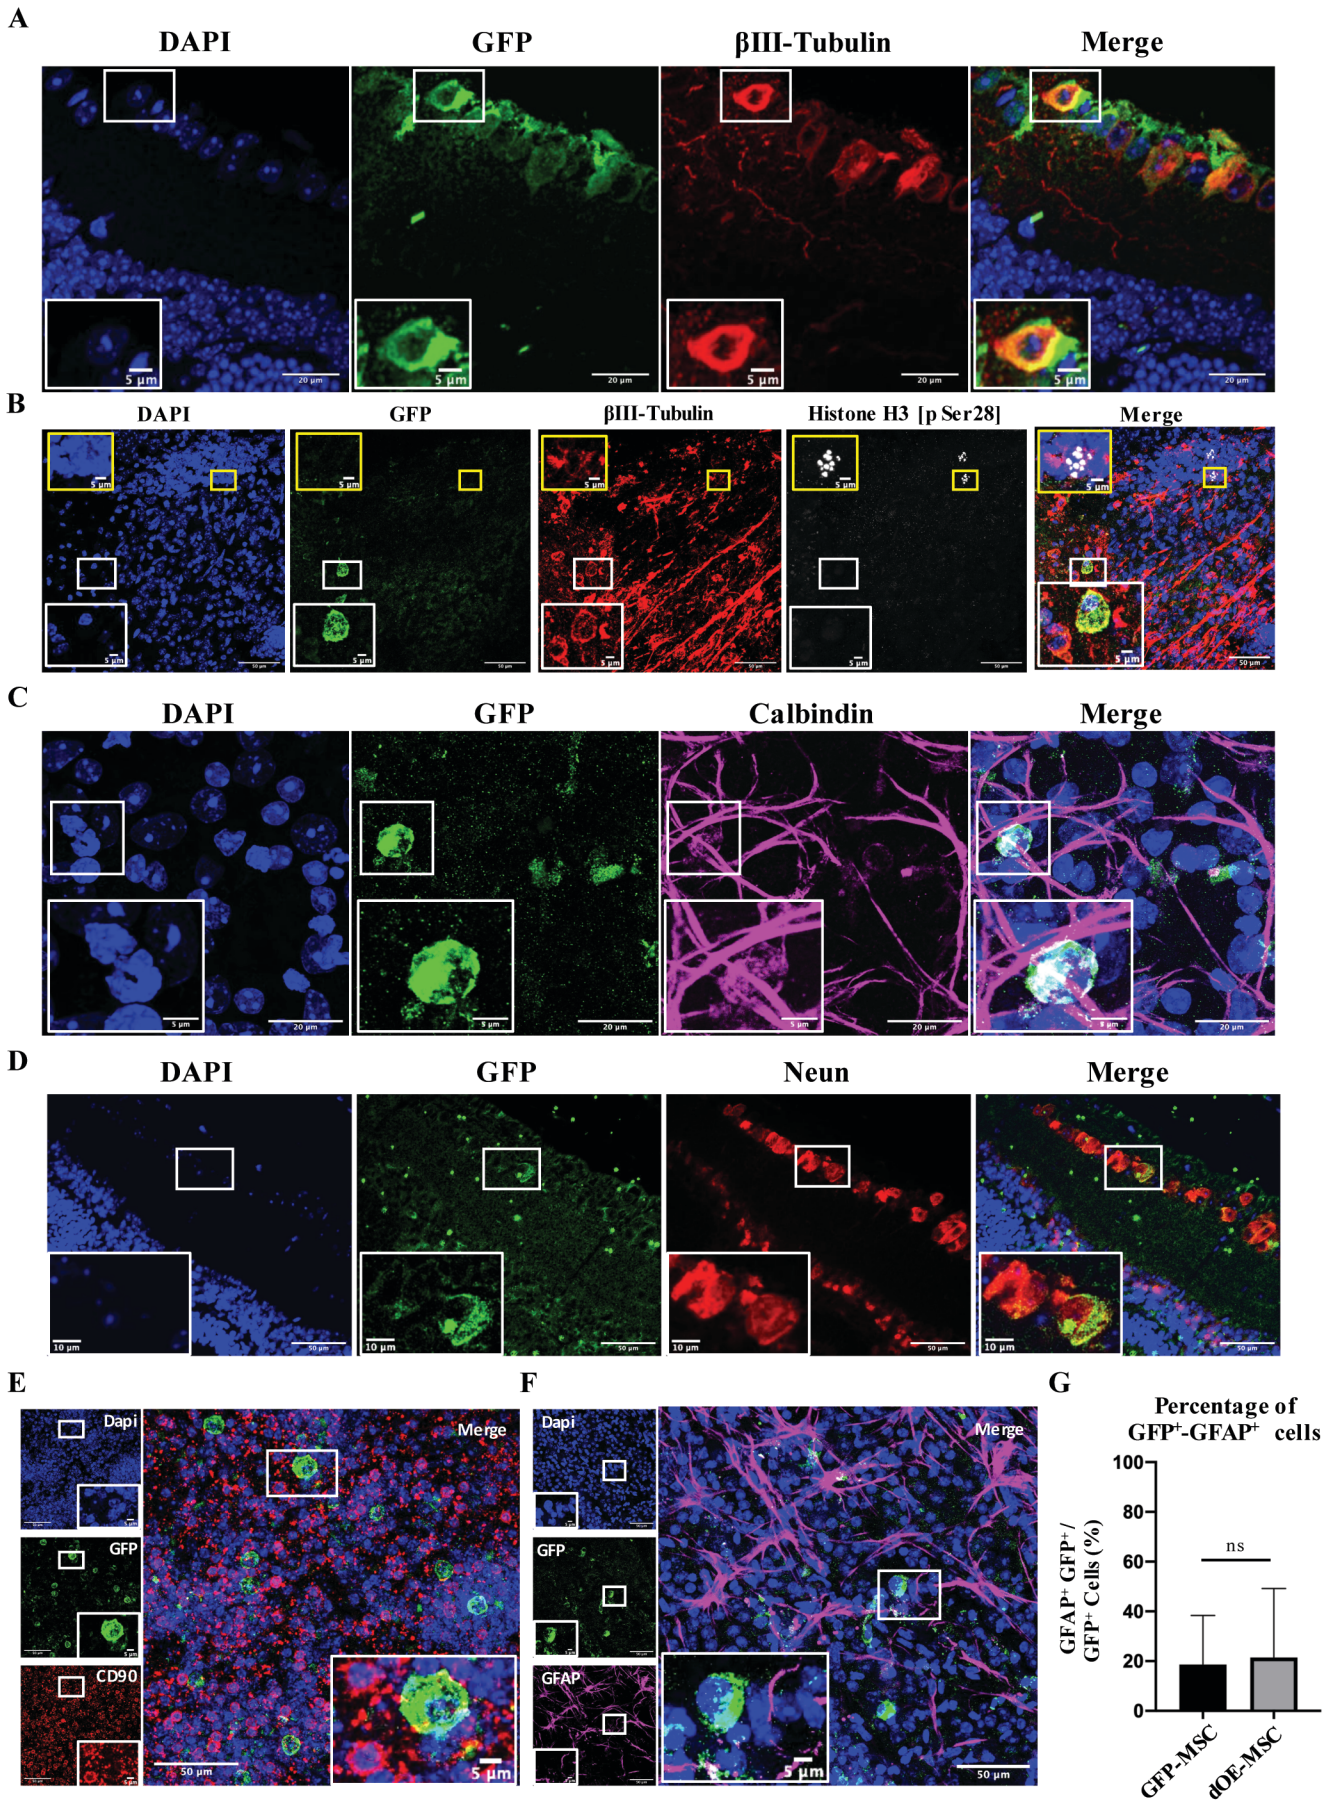

Fig. S6

**Fig. S6. Transplanted MSCs integrate into the NMDA-damaged retina and express neural markers 3 weeks post-injection.** (A) Representative retinal section prepared from an NMDA-damaged eye that had been transplanted with dOE-MSCs, 3wpi. The tissue was stained for GFP (green),  $\beta$ III-tubulin (red) and DAPI (blue). Scale bar = 20  $\mu$ m. Inserts at the bottom-left corner show higher magnification of the regions in the white square (scale bar = 5  $\mu$ m). (B) Representative field of view from retinal flat mounts prepared from an NMDA-damaged eye that had been transplanted with dOE-MSCs (3wpi). The tissue was stained for GFP (green),  $\beta$ III-tubulin (red), phospho-Histone H3 (Ser10) (white) and DAPI (blue). Scale bar = 50  $\mu$ m. Inserts at the bottom-left and upper-right corners show higher magnification of the regions in the white and yellow squares respectively (scale bar = 5  $\mu$ m). (C) Representative field of view from retinal flat mounts prepared from an NMDA-damaged eye that had been transplanted with dOE-MSCs (3wpi). The tissue was stained for GFP (green), calbindin (magenta) and DAPI (blue). Scale bar = 20  $\mu$ m. Inserts at the bottom-left corner show higher magnification of the regions in the white square (scale bar = 5  $\mu$ m). (D) Representative retinal section prepared from an NMDA-damaged eye that had been transplanted with dOE-MSCs, 3wpi. The tissue was stained for GFP (green), Neun (red) and DAPI (blue). Scale bar = 50  $\mu$ m. Inserts at the bottom-left corner show higher magnification of the regions in the white square (scale bar = 10  $\mu$ m). (E) Representative field of view from retinal flat mounts prepared from an NMDA-damaged eye that had been transplanted with dOE-MSCs (3wpi). The tissue was stained for GFP (green), CD90 (red) and DAPI (blue). Scale bar = 50  $\mu$ m. Inserts at the bottom-right corner show higher magnification of the regions in the white square (scale bar = 5  $\mu$ m). (F) Representative field of view from retinal flat mounts prepared from an NMDA-damaged eye that had been transplanted with dOE-MSCs (3wpi). The tissue was stained for GFP (green), GFAP (magenta) and DAPI (blue). Scale bar = 50  $\mu$ m. Inserts at the bottom-left corner show higher magnification of the regions in the white square (scale bar = 5  $\mu$ m). (G) Quantification of GFP<sup>+</sup>-GFAP<sup>+</sup> double positive cells from NMDA-damaged retinal flat mounts 3wpi, expressed as a percentage over the total GFP<sup>+</sup> cells in the field of view. Data are presented as mean  $\pm$  SD (n = 3). Two-tailed Student's T-test was used for statistical analysis.



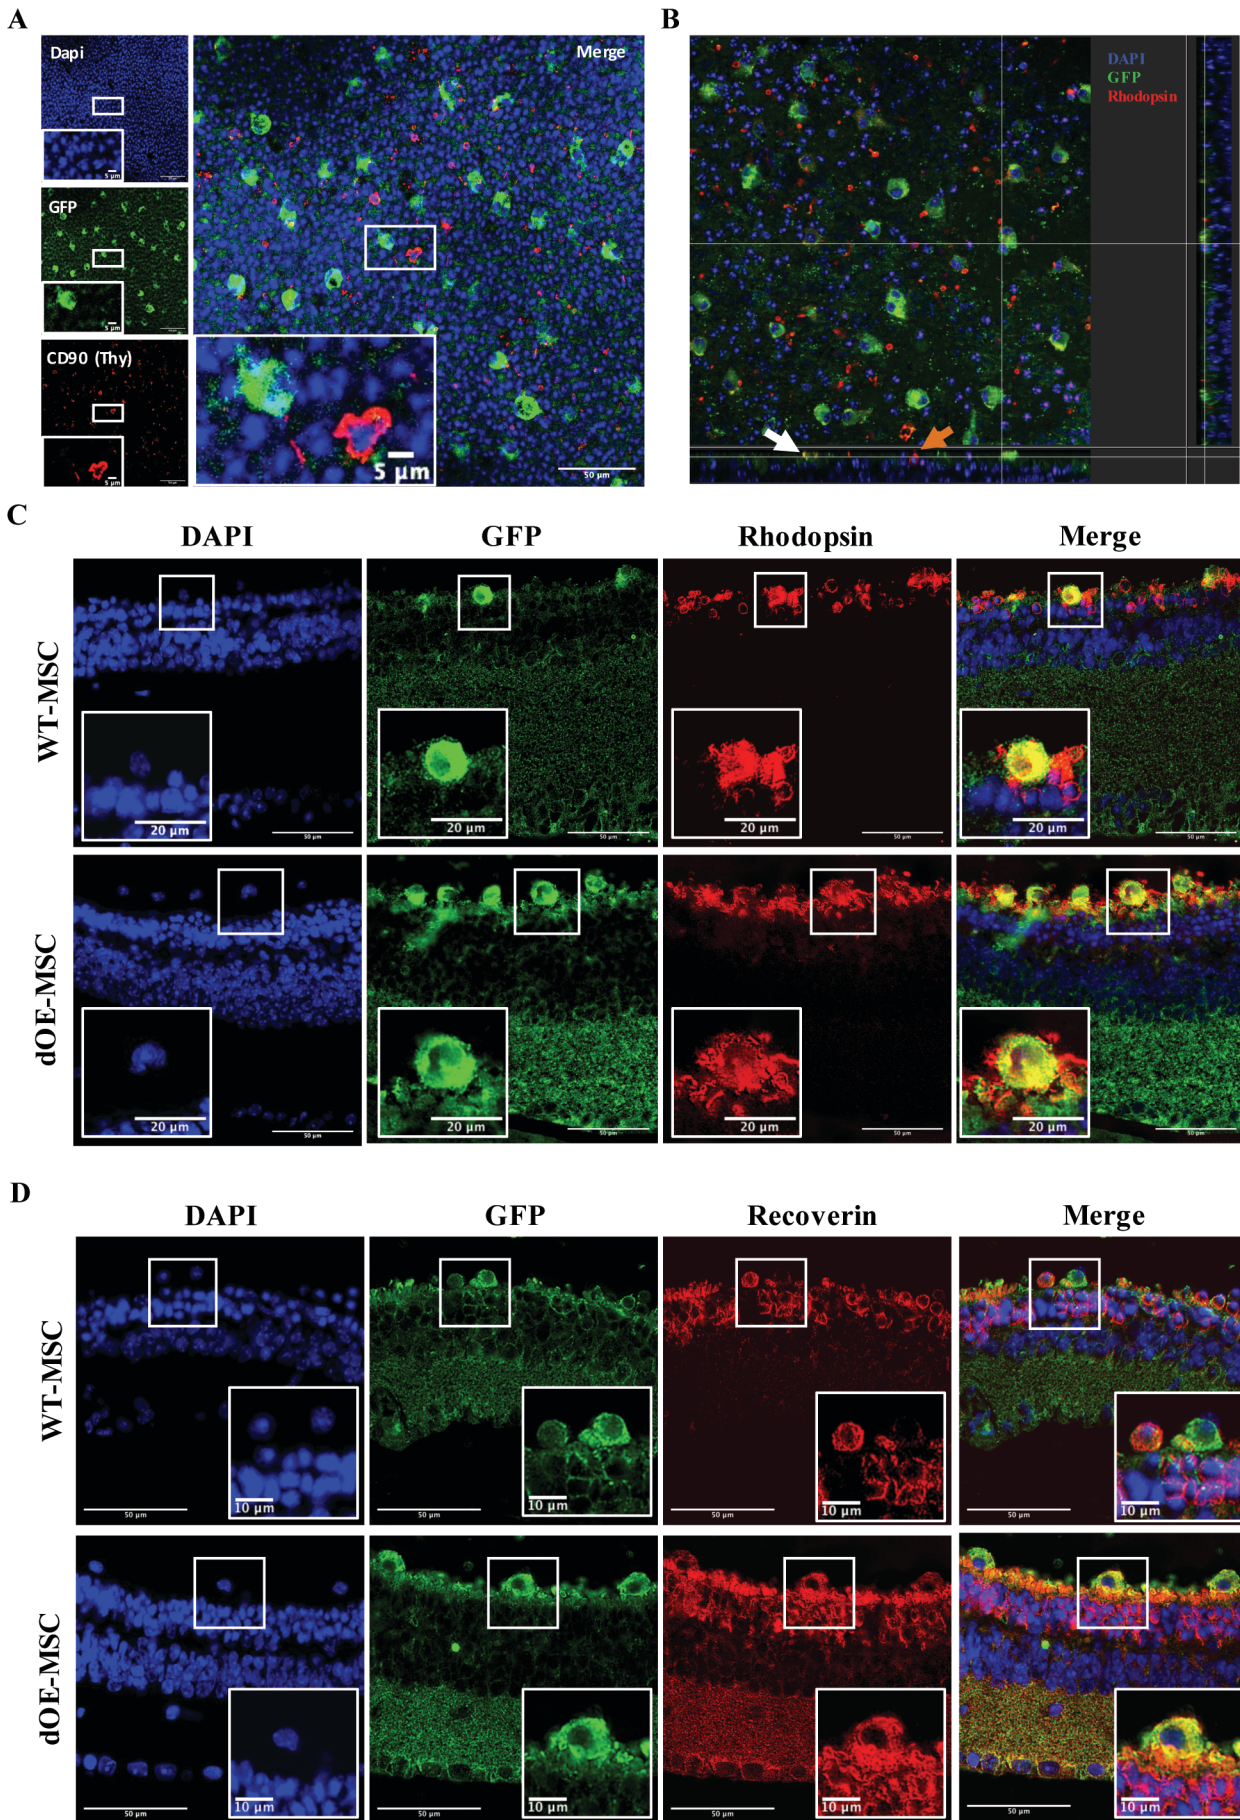

Fig. S7

**Fig. S7. Transplanted MSCs partially integrate into the host tissue and express photoreceptor markers 3 weeks post-injection.** (A) Representative field of view from retinal flat mounts prepared from an *rd10* eye that had been transplanted with dOE-MSCs (3wpi). The tissue was stained for GFP (green), CD90 (red) and DAPI (blue). Scale bar = 50  $\mu\text{m}$ . Inserts at the bottom-left corner show higher magnification of the regions in the white square (scale bar = 5  $\mu\text{m}$ ). (B) Orthogonal view from a retinal flat mount that had been transplanted with dOE-MSCs, 3wpi. The tissue was stained for GFP (green), rhodopsin (red), and DAPI (blue). The white arrow points at a GFP<sup>+</sup> cells that appears to be physically located within the same layer as the rhodopsin<sup>+</sup> (orange arrow). (C, D) Representative retinal section prepared from an *rd10* eye that had been transplanted with either GFP- (up) or dOE- (down) MSCs, 3wpi. The tissue was stained for GFP (green), rhodopsin (C) or recoverin (D) (red), and DAPI (blue). Scale bar = 50  $\mu\text{m}$ . Inserts at the bottom corner show higher magnification of the regions in the white square (scale bar = 20  $\mu\text{m}$  - C - or 10  $\mu\text{m}$  - D).

| <b>Gene</b>      | <b>Primer FW</b>           | <b>Primer RV</b>           |
|------------------|----------------------------|----------------------------|
| <i>mIl1-β</i>    | gccaccttttgacagtgatgaga    | ggacagcccaggtaaaggt        |
| <i>mCcl5</i>     | tcagagaggactctgagacagc     | gagtgggtgccgagccata        |
| <i>mCcl6</i>     | tctttatccttgggtgtcc        | tggagggttatagcgacgat       |
| <i>mCcl12</i>    | ggtattggctggaccagatg       | gggacactggctgcttgt         |
| <i>mCxcl1</i>    | agactccagccacactccaa       | tgacagcgcagctcattg         |
| <i>mCxcl2</i>    | actccagactccagccacac       | cagttcactggccacaacag       |
| <i>mCxcl5</i>    | tcttgggtgtgtaagagtgtct     | cacagcagcttctaaaaccataa    |
| <i>mCxcl9</i>    | ccatgaagtcgctgttctt        | tgagggtattgtagtggatcg      |
| <i>mCxcl10</i>   | atcagcaccatgaaccaag        | tccctatggccctcattct        |
| <i>mCxcl11</i>   | gcggtctgctgagatgaac        | cgcccctgtttgaacataag       |
| <i>mCxcl16</i>   | tgaactagtgactgctttgagc     | gcaaatgttttgggtgga         |
| <i>hIL1-β</i>    | tacctgtcctgcgtgtgaa        | tctttggtaatttttgggatct     |
| <i>hTNF-α</i>    | cagcctcttctcctctctgat      | gccagagggtgattagaga        |
| <i>hCCL2</i>     | agtctctgccgcccttct         | gtgactggggcattgattg        |
| <i>hCCL5</i>     | cgctgtcatcctcattgcta       | ggtgtggtgtccgaggaata       |
| <i>hCCL21</i>    | tccatcccagctatcctgtt       | agctccttgggtctgcac         |
| <i>hCCL22</i>    | cgttggtgaaacacttctactgg    | ccttaccctgaaggtagcaa       |
| <i>hCCL23</i>    | ccaggaggatgaaggtctcc       | catcatgaactctgtctctgcat    |
| <i>hCXCL1</i>    | tctctcatccccatagtta        | cttcaggaacagccaccagt       |
| <i>hCXCL2</i>    | cccatggtaagaaaatcatcg      | cttcaggaacagccaccaat       |
| <i>hCXCL3</i>    | aaatcatcgaaaagatactgaacaag | ggtaagggcaggaccac          |
| <i>hCXCL6</i>    | gtccttcgggctccttgt         | cagcacagcagagacaggac       |
| <i>hCXCL9</i>    | tgttccccttctgttcattc       | gaaaggcactgcattgtgg        |
| <i>hCXCL10</i>   | gaaagcagttagcaaggaaaggt    | gacatatactccatgtagggaagtga |
| <i>hCXCL11</i>   | agtgtgaaggcatggcta         | tcttttgaacatggggaagc       |
| <i>hCXCL16</i>   | gcccttctctatgtgctgtg       | caggtatataatgaaccggcagat   |
| <i>mCcr1</i>     | ctgtgtggacaaaactctgga      | tggggtaggcttctgtgaaa       |
| <i>mCcr3</i>     | gaatcaaagagctgggggtca      | caggaggccgatgatgaa         |
| <i>mCcr5</i>     | caactttggggtgataacaagtg    | tggtaaagattatttctgggagaga  |
| <i>mCxcr2</i>    | caggaccaggaatgggagta       | tcccctccaaatatccccta       |
| <i>mCxcr3</i>    | gtggccaagtcatgcacctc       | cccacaaaggcatagagcag       |
| <i>mCxcr6</i>    | ccagctttaagatgcatcg        | ttaaggcaagcccgaagta        |
| <i>mCyclinD1</i> | gagattgtccatccatgc         | ctcctcttcgcacttctgct       |

|               |                             |                           |
|---------------|-----------------------------|---------------------------|
| <i>mBDNF</i>  | cagtggacatgtccgggtgggacggtc | ttcttggaacggcaacaaccacaac |
| <i>mNGF</i>   | tatactggccgcagtgaggt        | ggacattgctatctgtgtacgg    |
| <i>mPDGFa</i> | gatgaggacctgggcttg          | gatcaactcccgggtatct       |
| <i>mCTNF</i>  | gacctgactgcttattggaatct     | gcctggaggttctcttgga       |

**Table S1.** Primers used for qRT-PCR analysis.

| <b>Compound Name</b> | <b>Catalogue Number (R&amp;D Systems)</b> | <b>Receptor Inhibited</b> | <b>Working Concentration</b> |
|----------------------|-------------------------------------------|---------------------------|------------------------------|
| J 113863             | 2595/10                                   | Ccr1                      | 6 $\mu$ M                    |
| SB 328437            | 3650/10                                   | Ccr3                      | 25 $\mu$ M                   |
| Maraviroc            | 3756/10                                   | Ccr5                      | 7 $\mu$ M                    |
| SB 332235            | 5671/10                                   | Cxcr2                     | 8 $\mu$ M                    |
| ML 339               | 5943/10                                   | Cxcr6                     | 18 $\mu$ M                   |

**Table S2.** Name, catalogue number and working concentration of selective receptor antagonists.

| <b>Gene</b>       | <b>Primer FW</b>          | <b>Primer RV</b>          |
|-------------------|---------------------------|---------------------------|
| <i>mCcr1-CDS</i>  | atggagatttcagatttcacagaag | tcagaagccagcagagagc       |
| <i>mCcr3-CDS</i>  | atggcattcaacacagatgaaatc  | ctaaaacaccacagagatttcttg  |
| <i>mCcr5-CDS</i>  | atggatttcaagggtcagtcc     | tcataaaccagtagaaactcatg   |
| <i>mCxcr2-CDS</i> | atgggagaattcaaggtggataag  | ttagagggtagtagaggtgttg    |
| <i>mCxcr3-CDS</i> | atgtacctgaggttagtgaacgt   | ttacaagcccaggtaggagg      |
| <i>mCxcr6-CDS</i> | atggatgatgggcatcaagagtc   | ctacaattggaacatactggtggtc |

**Table S3.** List of primers used to amplify receptors' CDSs from total mouse spleen cDNA.
